# Supplementary material
Source: Springer Nature journal article supplement (https://www.springermedizin.de/resource/supplementary/12936_2014_3326_MOESM13_ESM.pdf/9545666)
Supplement: MOESM13 [file 9545666]

|     |     |     |     |      |     |     |     |     |
|-----|-----|-----|-----|------|-----|-----|-----|-----|
| 1.5 | 1.4 | 0.8 | 2.0 | 18.2 | 1.2 | 0.9 | 0.4 | 2.7 |
|-----|-----|-----|-----|------|-----|-----|-----|-----|

|     |     |     |
|-----|-----|-----|
| 0.2 | 0.6 | 0.0 |
|-----|-----|-----|

|     |     |     |
|-----|-----|-----|
| 0.2 | 0.6 | 0.8 |
|-----|-----|-----|

|     |     |     |
|-----|-----|-----|
| 2.6 | 4.1 | 4.3 |
|-----|-----|-----|

42.4
